# Supplementary material for: Clinical Pharmacology of Vinpocetine: Properties Revisited and Introduction of a Population Pharmacokinetic Model for Its Metabolite, Apovincaminic Acid (AVA)
Source: MDPI journal article supplement (doi:10.3390/pharmaceutics15102502), 2023-10-20
Supplement: s1 [file s1]

## Supplementary Materials

**Table S1.** Demographic data (Number of subjects = 12).

|                          | <i>MIN</i> | <i>MEDIAN</i> | <i>MAX</i> |
|--------------------------|------------|---------------|------------|
| Age                      | 20         | 23            | 35         |
| BMI (kg/m <sup>2</sup> ) | 20.9       | 24.9          | 32.56      |
| Height (m)               | 1.64       | 1.74          | 1.83       |
| Weight (kg)              | 66         | 73.5          | 93         |

**Table S2.** Change of estimated log-likelihood and information criteria (from top to bottom: final refined model, best structural model, and initial starting model).

|                                                |         |
|------------------------------------------------|---------|
| -2 x log-likelihood (OFV)                      | 2750.86 |
| Akaike Information Criteria (AIC)              | 2786.86 |
| Bayesian Information Criteria (BIC)            | 2815.36 |
| Corrected Bayesian Information Criteria (BICc) | 2831.57 |
| -2 x log-likelihood (OFV)                      | 2875.04 |
| Akaike Information Criteria (AIC)              | 2901.04 |
| Bayesian Information Criteria (BIC)            | 2952.63 |
| Corrected Bayesian Information Criteria (BICc) | 2937.84 |
| -2 x log-likelihood (OFV)                      | 3322.92 |
| Akaike Information Criteria (AIC)              | 3336.92 |
| Bayesian Information Criteria (BIC)            | 3348.01 |
| Corrected Bayesian Information Criteria (BICc) | 3357.27 |
